# Supplementary material for: First-principles study on structural stabilities, mechanical properties, and biaxial strain-induced superconductivity in Janus MoWC monolayer
Source: Royal Society of Chemistry journal article supplement (doi:10.1039/d4cp01215a), 2024-01-01
Supplement: d4cp01215a2.pdf [file d4cp01215a2.pdf]

## Supplementary Information

### First-principles study on structural stabilities, mechanical properties, and biaxial strain-induced superconductivity in Janus MoWC monolayer

Sirinee Thasitha,<sup>a</sup> Prutthipong Tsuppayakorn-aek,<sup>b,g</sup> Anan Udomkijmongkol,<sup>a</sup> Satchakorn Khammuang,<sup>a</sup> Thanayut Kaewmaraya,<sup>c,d</sup> Tanveer Hussain,<sup>e,f</sup> Thiti Bovornratanaraks,<sup>b,g</sup> Komsilp Kotmool<sup>a,\*</sup>

<sup>a</sup>College of Advanced Manufacturing Innovation, King Mongkut's Institute of Technology Ladkrabang, Bangkok 10520, Thailand. E-mail: komsilp.ko@kmitl.ac.th; Tel: +66 2329 8264

<sup>b</sup>Extreme Conditions Physics Research Laboratory and Center of Excellence in Physics of Energy Materials (CE:PEM), Department of Physics, Faculty of Science, Chulalongkorn University, Bangkok 10330, Thailand

<sup>c</sup>Integrated Nanotechnology Research Center, Department of Physics, Khon Kaen University, Khon Kaen, Thailand

<sup>d</sup>Institute of Nanomaterials Research and Innovation for Energy (IN-RIE), NANOTEC-KKU RNN on Nanomaterials Research and Innovation for Energy, Khon Kaen University, Khon Kaen, 40002, Thailand

<sup>e</sup>School of Chemical Engineering, The University of Queensland, St Lucia, Brisbane, 4072, Australia

<sup>f</sup>School of Science and Technology, University of New England, Armidale, New South Wales 2351, Australia

<sup>g</sup>Thailand Center of Excellence in Physics, Ministry of Higher Education, Science, Research and Innovation, 328 Si Ayutthaya Road, Bangkok, 10400, Thailand

\*Corresponding E-mail: [komsilp.ko@kmitl.ac.th](mailto:komsilp.ko@kmitl.ac.th)

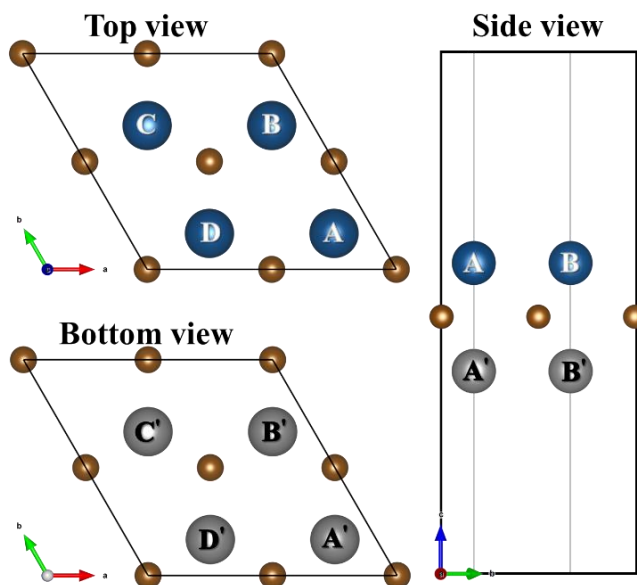

**Fig. S1** Top, bottom, and side views of the 2H-MoWC within the  $2 \times 2 \times 1$  supercell.

**Table S1** The atomic arrangement of the 2H-MoWC phase in each model respecting the atomic positions in Fig. S1.

| Model        | Positions |    |    |    |    |    |    |    |
|--------------|-----------|----|----|----|----|----|----|----|
|              | A         | B  | C  | D  | A' | B' | C' | D' |
| 2H-MoWC-I    | Mo        | Mo | Mo | Mo | W  | W  | W  | W  |
| 2H-MoWC-II   | W         | Mo | Mo | Mo | Mo | W  | W  | W  |
| 2H-MoWC-III  | W         | Mo | W  | Mo | Mo | W  | Mo | W  |
| 2H-MoWC-IV   | Mo        | Mo | W  | W  | W  | W  | Mo | Mo |
| 2H-MoWC-V    | W         | Mo | W  | Mo | W  | Mo | W  | Mo |
| 2H-MoWC-VI   | Mo        | Mo | W  | Mo | W  | Mo | W  | W  |
| 2H-MoWC-VII  | Mo        | Mo | W  | W  | Mo | Mo | W  | W  |
| 2H-MoWC-VIII | Mo        | Mo | Mo | W  | W  | Mo | W  | W  |
| 2H-MoWC-IX   | Mo        | Mo | W  | W  | Mo | W  | Mo | W  |
| 2H-MoWC-X    | W         | Mo | W  | Mo | W  | W  | Mo | Mo |

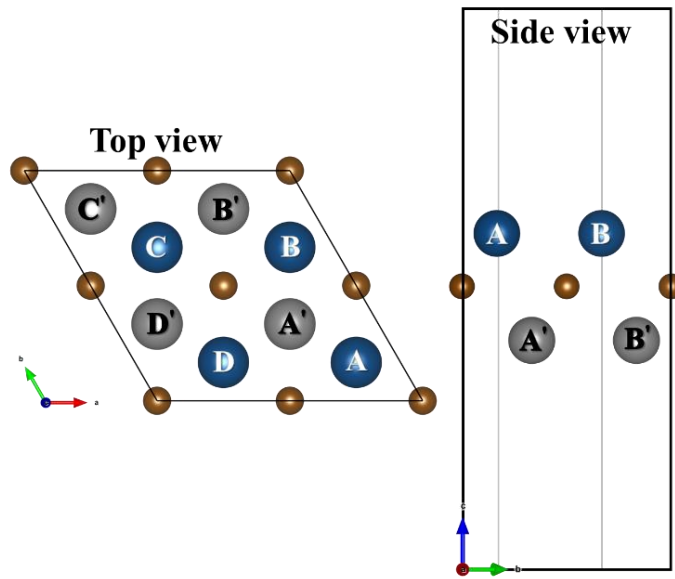

**Fig. S2** Top, bottom, and side views of the 1T-MoWC within the  $2 \times 2 \times 1$  supercell.

**Table S2** The atomic arrangement of the 1T-MoWC phase in each model from the atomic positions depicted in Fig. S2.

| Model        | Positions |    |    |    |    |    |    |    |
|--------------|-----------|----|----|----|----|----|----|----|
|              | A         | B  | C  | D  | A' | B' | C' | D' |
| 1T-MoWC-I    | Mo        | Mo | Mo | Mo | W  | W  | W  | W  |
| 1T-MoWC-II   | W         | Mo | Mo | Mo | Mo | W  | W  | W  |
| 1T-MoWC-III  | W         | Mo | W  | Mo | Mo | W  | Mo | W  |
| 1T-MoWC-IV   | Mo        | Mo | W  | W  | W  | W  | Mo | Mo |
| 1T-MoWC-V    | W         | Mo | W  | Mo | W  | Mo | W  | Mo |
| 1T-MoWC-VI   | Mo        | Mo | W  | Mo | W  | Mo | W  | W  |
| 1T-MoWC-VII  | Mo        | Mo | W  | W  | Mo | Mo | W  | W  |
| 1T-MoWC-VIII | Mo        | Mo | Mo | W  | W  | Mo | W  | W  |
| 1T-MoWC-IX   | Mo        | Mo | W  | W  | Mo | W  | Mo | W  |
| 1T-MoWC-X    | Mo        | W  | Mo | W  | Mo | W  | W  | Mo |

**Table S3** Lattice parameter a, b, c (Å), angle  $\alpha$ ,  $\beta$ ,  $\gamma$  (deg.), relative energies ( $\Delta E$ ) in meV/ f.u. (f.u. stands for formula unit) respecting the lowest one of all calculated configurations of the 2H- and 1T-MoWC phases without spin-orbit coupling.

| Phase        | Lattice parameter (Å) |       |          | Angle (deg.) |          | $\Delta E$<br>(meV/f.u.) |
|--------------|-----------------------|-------|----------|--------------|----------|--------------------------|
|              | a                     | b     | $\alpha$ | $\beta$      | $\gamma$ |                          |
| 2H-MoWC-I    | 5.678                 | 5.678 | 89.986   | 90.014       | 119.909  | 0                        |
| 2H-MoWC-II   | 5.677                 | 5.677 | 89.993   | 90.007       | 119.921  | 6                        |
| 2H-MoWC-III  | 5.676                 | 5.676 | 90.000   | 90.000       | 119.901  | 8                        |
| 2H-MoWC-IV   | 5.677                 | 5.676 | 90.000   | 90.000       | 119.908  | 8                        |
| 2H-MoWC-V    | 5.676                 | 5.676 | 90.000   | 90.000       | 119.929  | 15                       |
| 2H-MoWC-VI   | 5.677                 | 5.678 | 89.993   | 90.006       | 119.925  | 10                       |
| 2H-MoWC-VII  | 5.676                 | 5.679 | 90.000   | 90.000       | 119.940  | 15                       |
| 2H-MoWC-VIII | 5.677                 | 5.677 | 89.995   | 90.005       | 119.923  | 10                       |
| 2H-MoWC-IX   | 5.676                 | 5.677 | 89.999   | 90.001       | 119.927  | 12                       |
| 2H-MoWC-X    | 5.676                 | 5.677 | 89.998   | 90.004       | 119.924  | 12                       |
| 1T-MoWC-I    | 5.848                 | 5.848 | 90.061   | 89.939       | 120.052  | 335                      |
| 1T-MoWC-II   | 5.841                 | 5.841 | 90.038   | 89.962       | 120.046  | 330                      |
| 1T-MoWC-III  | 5.816                 | 5.816 | 89.985   | 90.015       | 120.030  | 334                      |
| 1T-MoWC-IV   | 5.844                 | 5.842 | 90.054   | 89.974       | 120.043  | 326                      |
| 1T-MoWC-V    | 5.853                 | 5.853 | 90.082   | 89.918       | 120.056  | 321                      |
| 1T-MoWC-VI   | 5.844                 | 5.845 | 90.054   | 89.918       | 120.058  | 327                      |
| 1T-MoWC-VII  | 5.826                 | 5.829 | 90.036   | 89.909       | 120.059  | 327                      |
| 1T-MoWC-VIII | 5.834                 | 5.834 | 90.054   | 89.946       | 120.055  | 331                      |
| 1T-MoWC-IX   | 5.834                 | 5.835 | 90.037   | 89.952       | 120.049  | 326                      |
| 1T-MoWC-X    | 5.837                 | 5.837 | 90.053   | 89.958       | 120.050  | 327                      |

**Table S4** Lattice parameter a, b, c (Å), angle  $\alpha$ ,  $\beta$ ,  $\gamma$  (deg), relative energies ( $\Delta E$ ) in meV/ f.u. (f.u. stands for formula unit) respecting the lowest one (2H-MoWC-I) of all calculated configurations of the 2H- and 1T-MoWC phases with spin-orbit coupling.

| Phase        | Lattice parameter (Å) |       |          | Angle (deg.) |          | $\Delta E$<br>(meV/f.u.) |
|--------------|-----------------------|-------|----------|--------------|----------|--------------------------|
|              | a                     | b     | $\alpha$ | $\beta$      | $\gamma$ |                          |
| 2H-MoWC-I    | 5.687                 | 5.687 | 90.000   | 90.000       | 120.000  | 0                        |
| 2H-MoWC-II   | 5.685                 | 5.685 | 90.000   | 90.000       | 120.000  | 7                        |
| 2H-MoWC-III  | 5.685                 | 5.685 | 90.001   | 89.999       | 120.034  | 9                        |
| 2H-MoWC-IV   | 5.686                 | 5.683 | 90.000   | 90.000       | 119.983  | 9                        |
| 2H-MoWC-V    | 5.687                 | 5.687 | 90.000   | 90.000       | 120.087  | 15                       |
| 2H-MoWC-VI   | 5.687                 | 5.684 | 90.002   | 90.000       | 120.023  | 9                        |
| 2H-MoWC-VII  | 5.687                 | 5.679 | 90.000   | 90.000       | 119.957  | 15                       |
| 2H-MoWC-VIII | 5.684                 | 5.684 | 90.000   | 90.001       | 119.956  | 9                        |
| 2H-MoWC-IX   | 5.687                 | 5.684 | 88.371   | 93.386       | 120.021  | 11                       |
| 2H-MoWC-X    | 5.687                 | 5.683 | 90.095   | 89.800       | 120.023  | 12                       |
| 1T-MoWC-I    | 5.848                 | 5.848 | 90.061   | 89.939       | 120.052  | 386                      |
| 1T-MoWC-II   | 5.841                 | 5.841 | 90.038   | 89.962       | 120.046  | 387                      |
| 1T-MoWC-III  | 5.816                 | 5.816 | 89.985   | 90.015       | 120.030  | 392                      |
| 1T-MoWC-IV   | 5.844                 | 5.842 | 90.054   | 89.974       | 120.043  | 386                      |
| 1T-MoWC-V    | 5.792                 | 5.792 | 89.608   | 90.381       | 119.926  | 380                      |
| 1T-MoWC-VI   | 5.802                 | 5.803 | 90.008   | 90.128       | 120.009  | 401                      |
| 1T-MoWC-VII  | 5.827                 | 5.829 | 90.036   | 89.909       | 120.059  | 389                      |
| 1T-MoWC-VIII | 5.834                 | 5.834 | 90.054   | 89.946       | 120.055  | 393                      |
| 1T-MoWC-IX   | 5.798                 | 5.801 | 89.853   | 90.009       | 119.985  | 383                      |
| 1T-MoWC-X    | 5.837                 | 5.837 | 90.053   | 89.958       | 120.050  | 387                      |

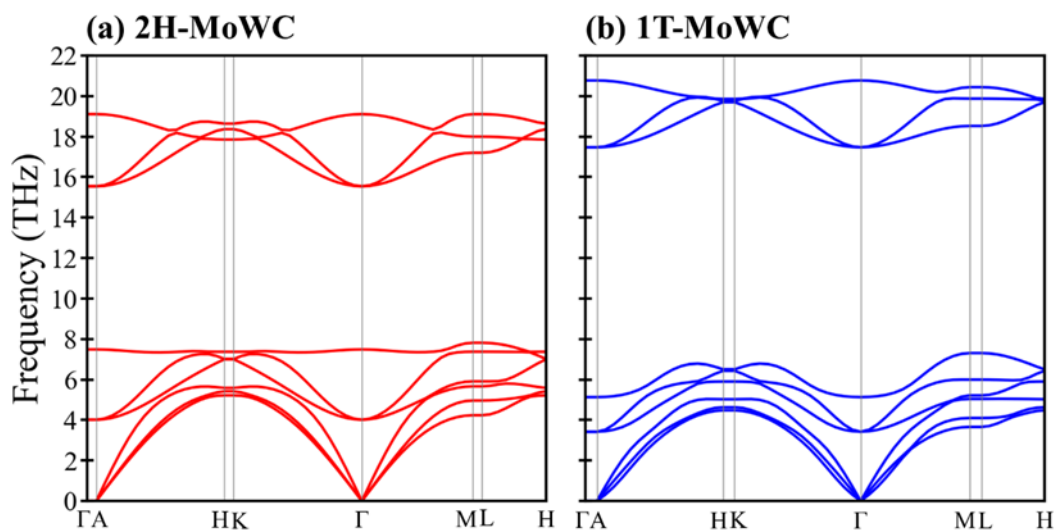

**Fig. S3** The phonon dispersion curves of the 2H (a) and 1T (b) phases of the Janus MoWC monolayer at unstressed conditions show that these two phases are dynamically stable, as there are no imaginary phonon frequencies present.

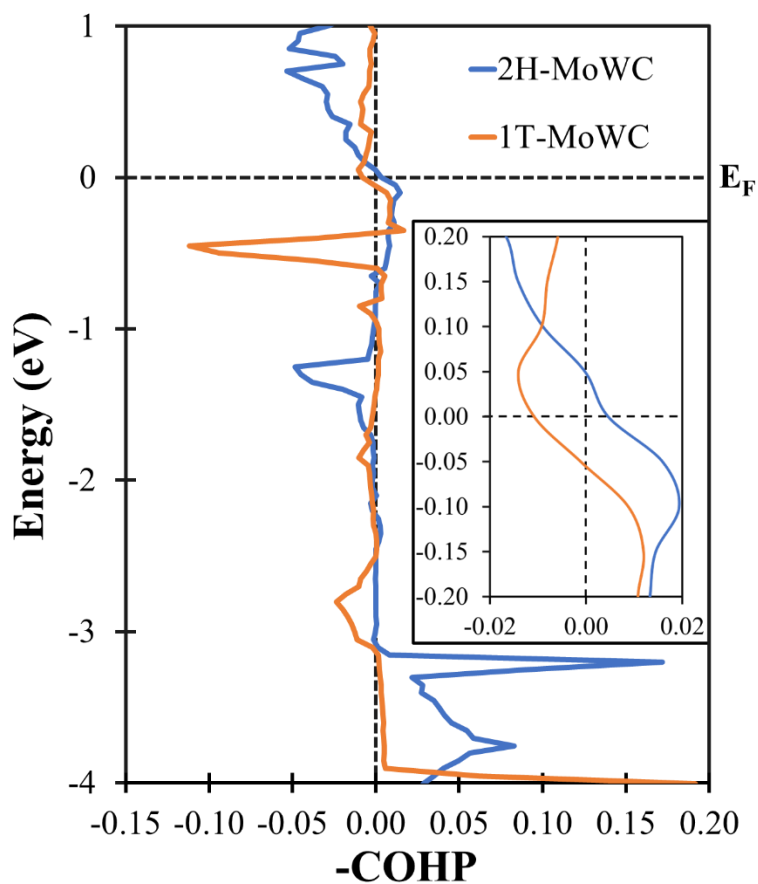

**Fig. S4** The COHP plot of the C-C bond in both the 2H and 1T phases.

**Table S5** The elastic constants ( $C_{ij}$  values) for the 2H and 1T-MoWC phases.

| Model     | Elastic constants (GPa) |          |          |          |          |                   | Ref.      |
|-----------|-------------------------|----------|----------|----------|----------|-------------------|-----------|
|           | $C_{11} = C_{22}$       | $C_{12}$ | $C_{13}$ | $C_{33}$ | $C_{44}$ | $C_{55} = C_{66}$ |           |
| 2H-MoWC-I | 561                     | 241      | 137      | 455      | 160      | 137               | This work |
| 1T-MoWC-I | 539                     | 156      | 236      | 178      | 191      | 88                | This work |
| $Ti_3C_2$ | 422                     | 132      | 133      | 295      | 145      | 150               | This work |
| $Ti_3C_2$ | 473                     |          |          |          |          |                   | [1]       |

To bolster reliability, we replicated the calculated elastic constant in our study. Furthermore, we computed the elastic constant for  $Ti_3C_2$  MXene material to juxtapose against existing data, as detailed in Table S5. Our findings demonstrate that our methodology produced elastic constants for  $Ti_3C_2$  consistent with those reported previously. Hence, we have confidence in the reliability of the reproduced elastic constant for the Janus MoWC monolayer.

## References

- [1] N. Zhang, Y. Hong, S. Yazdanparast, and M. A. Zaeem, "Superior structural, elastic and electronic properties of 2D titanium nitride MXenes over carbide MXenes: a comprehensive first principles study," *2D Materials*, vol. 5, no. 4, p. 045004, 2018.
